# Supplementary material for: How Possible Is the Elimination of Viral Hepatitis? An Analysis Based on the Global Burden of Disease from Hepatitis B and C, 1990–2019
Source: MDPI journal article supplement (doi:10.3390/microorganisms12020388), 2024-02-15
Supplement: s1 [file s1]

**Table S1. Global percent change of age-standardized prevalence and incidence of HBV and HCV, all age and both sex 1990 and 2019**

| Virus      | SDI countries   | Period            | APC<br>(Lower CI - upper CI) | AAPC (lower CI - upper CI) |
|------------|-----------------|-------------------|------------------------------|----------------------------|
| Prevalence |                 |                   |                              |                            |
| HBV        | Global          | 1990-2000         | -0,3* (-0,4,-0,3)            | -1,3* (-1,3,-1,3)          |
|            |                 | 2000-2004         | -2,0* (-2,2,-1,8)            |                            |
|            |                 | 2004-2019         | -1,7* (-1,8,-1,7)            |                            |
|            | High SDI        | 1990-2019         | -0,9* (-1,-0,9)              | -0,9* (-1,-0,9)            |
|            | High-middle SDI | 1990-2000         | 0,1* (0,0,2)                 | -1,1* (-1,2,-1,1)          |
|            |                 | 2000-2007         | -2,3* (-2,5,-2,2)            |                            |
|            |                 | 2007-2019         | -1,5* (-1,6,-1,4)            |                            |
|            | Middle-SDI      | 1990-2000         | -0,8* (-0,9,-0,7)            | -1,7* (-1,7,-1,7)          |
|            |                 | 2000-2007         | -2,6* (-2,8,-2,4)            |                            |
|            |                 | 2007-2019         | -1,9* (-2,-1,9)              |                            |
|            | Low-middle SDI  | 1990-2001         | -0,5* (-0,5,-0,4)            | -1,2* (-1,2,-1,2)          |
|            |                 | 2001-2011         | -1,5* (-1,5,-1,4)            |                            |
|            |                 | 2011-2014         | -2,3* (-2,4,-2)              |                            |
|            |                 | 2014-2019         | -1,5* (-1,6,-1,2)            |                            |
|            | Low SDI         | 1990-1995         | 0,3* (0,1,0,6)               | -1,3* (-1,3,-1,2)          |
|            |                 | 1995-2001         | -0,5* (-0,7,-0,3)            |                            |
|            |                 | 2001-2010         | -1,6* (-1,7,-1,5)            |                            |
|            |                 | 2010-2019         | -2,3* (-2,4,-2,2)            |                            |
| HCV        | Global          | 1990-1995         | -1,6* (-1,9,-1)              | -0,4* (-0,5,-0,4)          |
|            |                 | 1995-2000         | -2,4* (-3,1,-2,1)            |                            |
|            |                 | 2000-2004         | -0,3 (-1,5,0,3)              |                            |
|            |                 | 2004-2010         | 0,6* (0,4,1,3)               |                            |
|            |                 | 2010-2014         | -0,5* (-1,1,0)               |                            |
|            |                 | 2014-2019         | 1,5* (1,1,2)                 |                            |
|            | High SDI        | 1990-1995         | 0,1 (-0,1,0,2)               | 0,4* (0,4,0,4)             |
|            |                 | 1995-2005         | 1,0* (1,1,1)                 |                            |
|            |                 | 2005-2010         | 0 (-0,1,0,2)                 |                            |
|            |                 | 2010-2015         | -0,5* (-0,7,-0,4)            |                            |
|            |                 | 2015-2019         | 0,8* (0,6,0,9)               |                            |
|            | High-middle SDI | 1990-1994         | -1,7 (-2,6,0,1)              | -0,5* (-0,6,-0,3)          |
|            |                 | 1994-2002         | -2,9 (-4,0,5)                |                            |
|            |                 | 2002-2015         | 0 (-0,4,0,4)                 |                            |
|            |                 | 2015-2019         | 4,2* (3,2,5,8)               |                            |
|            | Middle-SDI      | 1990-2001         | -3,7* (-4,3,-3,3)            | -0,9* (-1,1,-0,8)          |
|            |                 | 2001-2015         | 0,4 (-3,4,0,7)               |                            |
|            |                 | 2015-2019         | 2,2* (0,7,4,5)               |                            |
|            | Low-middle SDI  | 1990-1995         | -0,7* (-0,8,-0,6)            | -0,3* (-0,3,-0,2)          |
|            |                 | 1995-2000         | -2,3* (-2,4,-2,2)            |                            |
|            |                 | 2000-2005         | 0,1 (-0,1,0,2)               |                            |
|            |                 | 2005-2010         | 0,8* (0,7,1,1)               |                            |
|            |                 | 2010-2015         | 0,1 (-0,1,0,2)               |                            |
|            |                 | 2015-2019         | 0,7* (0,5,1)                 |                            |
| Low SDI    | 1990-1997       | -0,3* (-0,4,-0,3) | -0,5* (-0,5,-0,5)            |                            |
|            | 1997-2004       | -0,2* (-0,3,-0,2) |                              |                            |
|            | 2004-2010       | -0,6* (-0,6,-0,5) |                              |                            |
|            | 2010-2017       | -1,1* (-1,1,-1,1) |                              |                            |
|            | 2017-2019       | 0,3* (0,2,0,4)    |                              |                            |
| Incidence  |                 |                   |                              |                            |
| HBV        | Global          | 1990-2000         | -0,4* (-0,5,-0,4)            | -1,4* (-1,5,-1,4)          |
|            |                 | 2000-2011         | -1,7* (-1,7,-1,6)            |                            |

| Virus | SDI countries | Period    | APC<br>(Lower CI - upper CI) | AAPC (lower CI - upper CI) |
|-------|---------------|-----------|------------------------------|----------------------------|
|       | High          | 2011-2019 | -2,4* (-2,5,-2,3)            | -1,4* (-1,5,-1,4)          |
|       |               | 1990-2005 | -1,2* (-1,2,-1,1)            |                            |
|       |               | 2005-2015 | -1,5* (-1,6,-1,4)            |                            |
|       |               | 2015-2019 | -2,2* (-2,7,-2)              |                            |
|       | High-middle   | 1990-2000 | 0,1* (0,1,0,2)               | -1,7* (-1,7,-1,7)          |
|       |               | 2000-2011 | -2,2* (-2,2,-2,1)            |                            |
|       |               | 2011-2019 | -3,4* (-3,5,-3,3)            |                            |
|       | Middle        | 1990-2000 | -0,9* (-1,-0,8)              | -1,9* (-1,9,-1,9)          |
|       |               | 2000-2012 | -2,0* (-2,1,-1,9)            |                            |
|       |               | 2012-2019 | -3,1* (-3,2,-2,9)            |                            |
|       | Low-middle    | 1990-2000 | -0,5* (-0,6,-0,5)            | -1,2* (-1,2,-1,1)          |
|       |               | 2000-2011 | -1,3* (-1,4,-1)              |                            |
|       |               | 2011-2014 | -2,0* (-2,2,-1,3)            |                            |
|       |               | 2014-2019 | -1,5* (-1,7,-1,2)            |                            |
|       | Low           | 1990-1996 | 0,1 (0,0,3)                  | -1,2* (-1,2,-1,1)          |
|       |               | 1996-2001 | -0,5* (-0,8,-0,3)            |                            |
|       |               | 2001-2011 | -1,6* (-1,6,-1,5)            |                            |
|       |               | 2011-2019 | -2,0* (-2,1,-1,9)            |                            |
| HCV   | Global        | 1990-2000 | -1,9* (-1,9,-1,9)            | -0,6* (-0,6,-0,6)          |
|       |               | 2000-2004 | -0,4* (-0,5,-0,2)            |                            |
|       |               | 2004-2010 | 0,3* (0,2,0,4)               |                            |
|       |               | 2010-2015 | -0,5* (-0,6,-0,4)            |                            |
|       |               | 2015-2019 | 0,8* (0,7,0,9)               |                            |
|       | High          | 1990-1995 | 0 (-0,1,0,1)                 | 0,3* (0,3,0,3)             |
|       |               | 1995-1999 | 1,0* (0,5,1,1)               |                            |
|       |               | 1999-2003 | 0,5* (0,3,0,8)               |                            |
|       |               | 2003-2010 | 0,3* (0,1,0,3)               |                            |
|       |               | 2010-2015 | -0,1* (-0,3,-0,1)            |                            |
|       | High-middle   | 2015-2019 | 0,5* (0,4,0,7)               | -1,1* (-1,1,-1)            |
|       |               | 1990-2000 | -3,3* (-3,5,-3,1)            |                            |
|       |               | 2000-2004 | -1,7* (-2,5,-0,8)            |                            |
|       |               | 2004-2015 | -0,2* (-0,3,0)               |                            |
|       |               | 2015-2019 | 2,8* (2,3,3,6)               |                            |
|       | Middle        | 1990-2000 | -3,7* (-3,8,-3,5)            | -1,0* (-1,1,-1)            |
|       |               | 2000-2004 | -0,7* (-1,5,-0,3)            |                            |
|       |               | 2004-2010 | 0,7* (0,5,1,4)               |                            |
|       |               | 2010-2014 | -0,5* (-1,2,-0,1)            |                            |
|       |               | 2014-2019 | 1,6* (1,2,2)                 |                            |
|       | Low-middle    | 1990-1995 | -1,1* (-1,2,-1)              | -0,8* (-0,8,-0,8)          |
|       |               | 1995-2000 | -2,4* (-2,5,-2,3)            |                            |
|       |               | 2000-2003 | -0,5* (-0,6,-0,3)            |                            |
|       |               | 2003-2011 | -0,1 (-0,1,0,1)              |                            |
|       |               | 2011-2017 | -0,6* (-0,8,-0,5)            |                            |
|       |               | 2017-2019 | 0 (-0,4,0,2)                 |                            |
|       | Low           | 1990-2004 | -0,2* (-0,2,-0,2)            | -0,7* (-0,7,-0,7)          |
|       |               | 2004-2008 | -0,7* (-0,8,-0,6)            |                            |
|       |               | 2008-2011 | -1,1* (-1,2,-1)              |                            |
|       |               | 2011-2017 | -1,6* (-1,6,-1,5)            |                            |
|       |               | 2017-2019 | -0,3* (-0,4,-0,2)            |                            |

\* Indicates that the APC or AAPC is significantly different of zero at the alpha = 0,05 level

**Table S2. Annual percent change of ASMR of HBV and HCV, all age and both sex, global and in countries grouped by SDI. 1990 to 2019**

| Hepatitis | SDI         | Period    | APC<br>(lower CI - upper CI) | AAPC<br>(lower CI - upper CI) |
|-----------|-------------|-----------|------------------------------|-------------------------------|
| HCV       | Global      | 1990-1995 | 1.1* (1.0,1.2)               | 0.3* (0.3,0.3)                |
|           |             | 1995-1999 | 0.2* (0.0,0.4)               |                               |
|           |             | 1999-2004 | -0.4* (-0.7,-0.3)            |                               |
|           |             | 2004-2014 | 0.1* (0.0,0.1)               |                               |
|           |             | 2014-2019 | 1.0* (0.9,1.2)               |                               |
|           | High        | 1990-1995 | 3.0* (2.8,3.3)               | 1.2* (1.2,1.3)                |
|           |             | 1995-1999 | 2.5* (1.2,2.7)               |                               |
|           |             | 1999-2004 | 0.9* (0.4,1.1)               |                               |
|           |             | 2004-2014 | 0.2* (0.1,0.3)               |                               |
|           |             | 2014-2019 | 0.9* (0.7,1.1)               |                               |
|           | High-middle | 1990-1995 | 1.6* (1.1,2.2)               | 0.1* (0.0,0.1)                |
|           |             | 1995-2012 | -0.6* (-0.7,-0.6)            |                               |
|           |             | 2012-2019 | 0.6* (0.3,1.0)               |                               |
|           | Middle      | 1990-1995 | 0.5* (0.4,0.7)               | 0.4* (0.4,0.4)                |
|           |             | 1995-1999 | -0.3* (-0.4,-0.1)            |                               |
|           |             | 1999-2002 | -1.2* (-1.4,-0.9)            |                               |
|           |             | 2002-2006 | -0.2 (-0.3,0.1)              |                               |
|           |             | 2006-2013 | 0.9* (0.8,1.0)               |                               |
|           |             | 2013-2019 | 1.4* (1.3,1.5)               |                               |
|           | Low-middle  | 1990-1998 | 0.5* (0.4,0.6)               | 0.5* (0.4,0.5)                |
|           |             | 1998-2004 | -0.1 (-0.5,0.1)              |                               |
|           |             | 2004-2011 | 0.6* (0.5,0.9)               |                               |
|           |             | 2011-2014 | -0.9* (-1.2,-0.5)            |                               |
|           |             | 2014-2019 | 1.6* (1.5,1.9)               |                               |
|           | Low         | 1990-1999 | -0.7* (-0.8,-0.6)            | -0.9* (-0.9,-0.8)             |
|           |             | 1999-2005 | -1.0* (-1.2,-0.9)            |                               |
|           |             | 2005-2015 | -1.4* (-1.5,-1.4)            |                               |
|           |             | 2015-2019 | 0.6* (0.5,0.7)               |                               |
| HBV       | Global      | 1990-1996 | 0.9* (0.7,1.1)               | -1.1* (-1.1,-1.0)             |
|           |             | 1996-2000 | -0.7* (-1.0,-0.4)            |                               |
|           |             | 2000-2004 | -4.3* (-4.5,-4.2)            |                               |
|           |             | 2004-2017 | -1.3* (-1.4,-1.3)            |                               |
|           |             | 2017-2019 | 0.8* (0.0,1.2)               |                               |
|           | High        | 1990-1993 | -0.6* (-1.3,-0.1)            | -0.3* (-0.4,-0.3)             |
|           |             | 1993-1996 | 0.8* (0.0,2.0)               |                               |
|           |             | 1996-2000 | 2.0 (-1.8,2.4)               |                               |

| Hepatitis | SDI         | Period    | APC<br>(lower CI - upper CI) | AAPC<br>(lower CI - upper CI) |
|-----------|-------------|-----------|------------------------------|-------------------------------|
|           |             | 2000-2010 | -1.8* (-1.9,-1.5)            |                               |
|           |             | 2010-2016 | -0.8* (-1.0,-0.5)            |                               |
|           |             | 2016-2019 | 1.4* (1.0,2.2)               |                               |
|           | High-middle | 1990-1995 | 2.8* (2.4,3.2)               | -1.7* (-1.8,-1.7)             |
|           |             | 1995-2000 | -1.0* (-1.3,-0.6)            |                               |
|           |             | 2000-2004 | -6.7* (-7.2,-6.3)            |                               |
|           |             | 2004-2008 | -1.7* (-2.2,-1.0)            |                               |
|           |             | 2008-2014 | -4.4* (-4.8,-4.2)            |                               |
|           |             | 2014-2019 | 0.5* (0.1,0.8)               |                               |
|           | Middel      | 1990-1996 | 0.9* (0.7,1.1)               | -1.2* (-1.2,-1.1)             |
|           |             | 1996-2000 | -1.3* (-1.6,-0.8)            |                               |
|           |             | 2000-2004 | -6.2* (-6.4,-5.9)            |                               |
|           |             | 2004-2007 | -1.6* (-2.0,-1.2)            |                               |
|           |             | 2007-2014 | -0.7* (-1.0,-0.4)            |                               |
|           |             | 2014-2019 | 0.2 (-0.0,0.8)               |                               |
|           | Low-middel  | 1990-2000 | 0.1 (-0.0,0.4)               | -0.5* (-0.6,-0.5)             |
|           |             | 2000-2004 | -1.5 (-2.1,0.0)              |                               |
|           |             | 2004-2014 | -0.3 (-1.2,0.3)              |                               |
|           |             | 2014-2017 | -2.7* (-3.3,-0.3)            |                               |
|           |             | 2017-2019 | 0.1 (-1.7,1.1)               |                               |
|           | Low         | 1990-2005 | -0.7* (-0.7,-0.6)            | -1.4* (-1.4,-1.4)             |
|           |             | 2005-2010 | -2.4* (-2.7,-0.8)            |                               |
|           |             | 2010-2013 | -1.9* (-2.2,-1.7)            |                               |
|           |             | 2013-2017 | -2.7* (-3.1,-2.6)            |                               |
|           |             | 2017-2019 | -1.0* (-1.5,-0.5)            |                               |

\* Indicates that the APC or AAPC is significantly different of zero at the alpha = 0,05 level

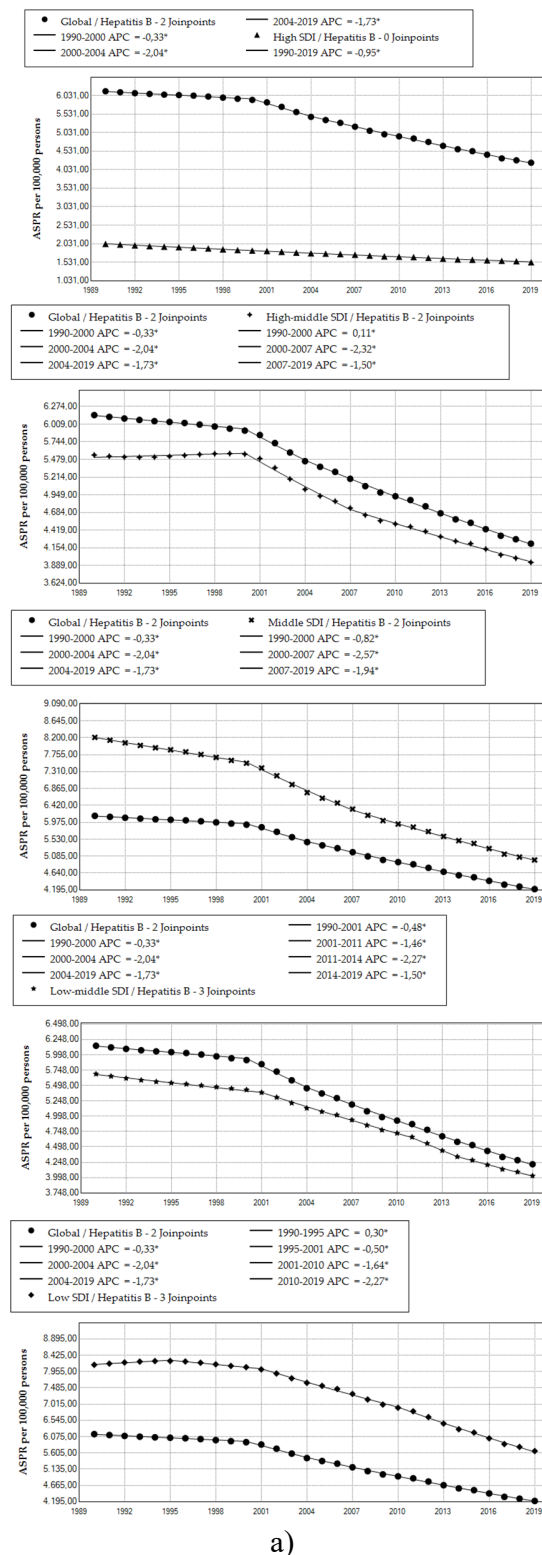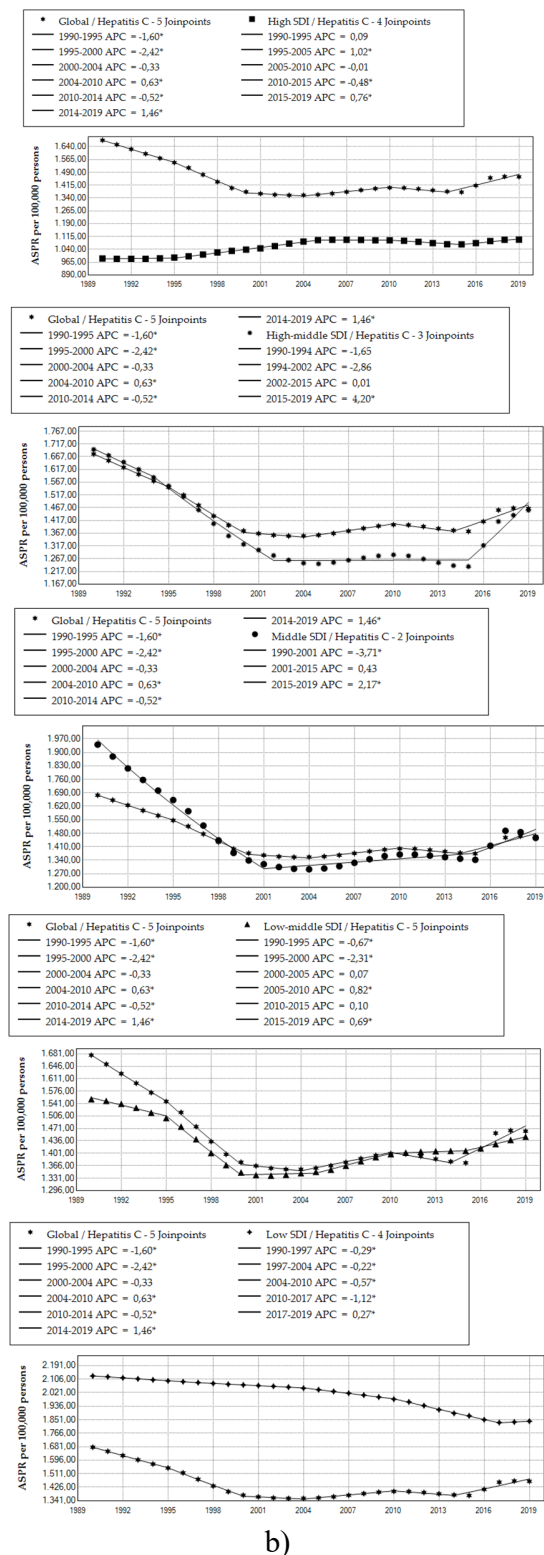

Figure S1. ASPR trends Global and countries grouped by SDI in viral hepatitis all ages and both sexes 1990 – 2019: (a) Trends in HBV prevalence; (b) Trends in HCV prevalence

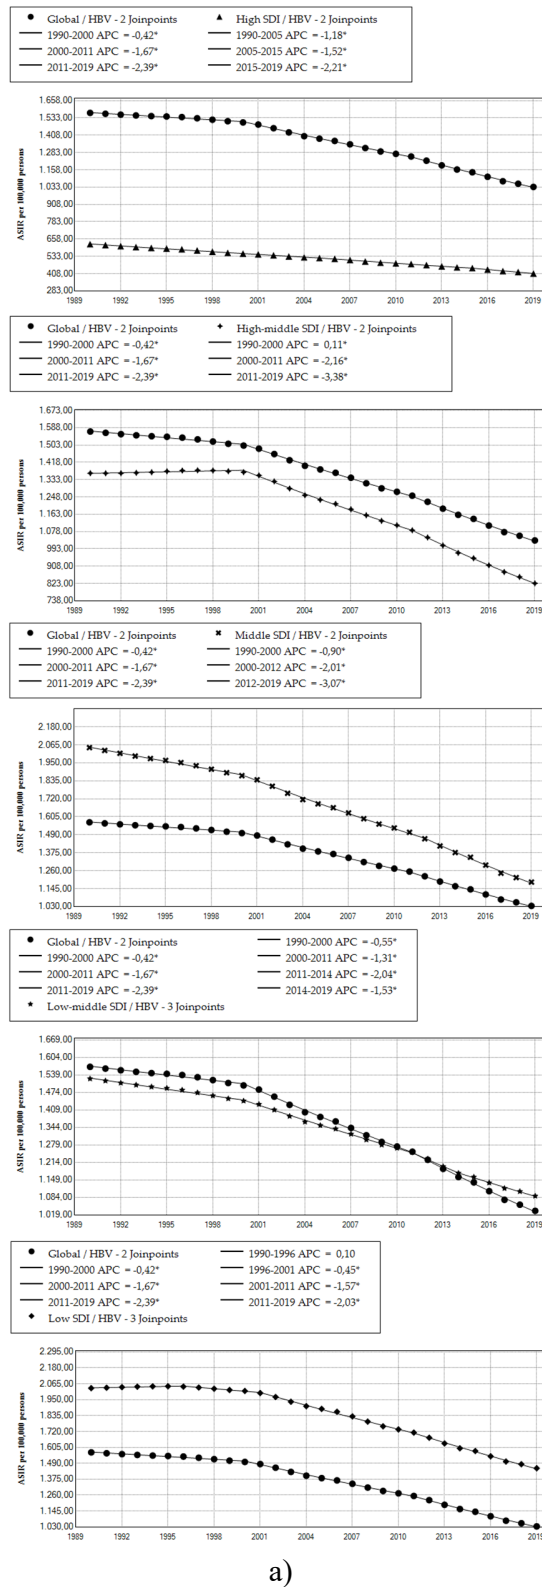

a)

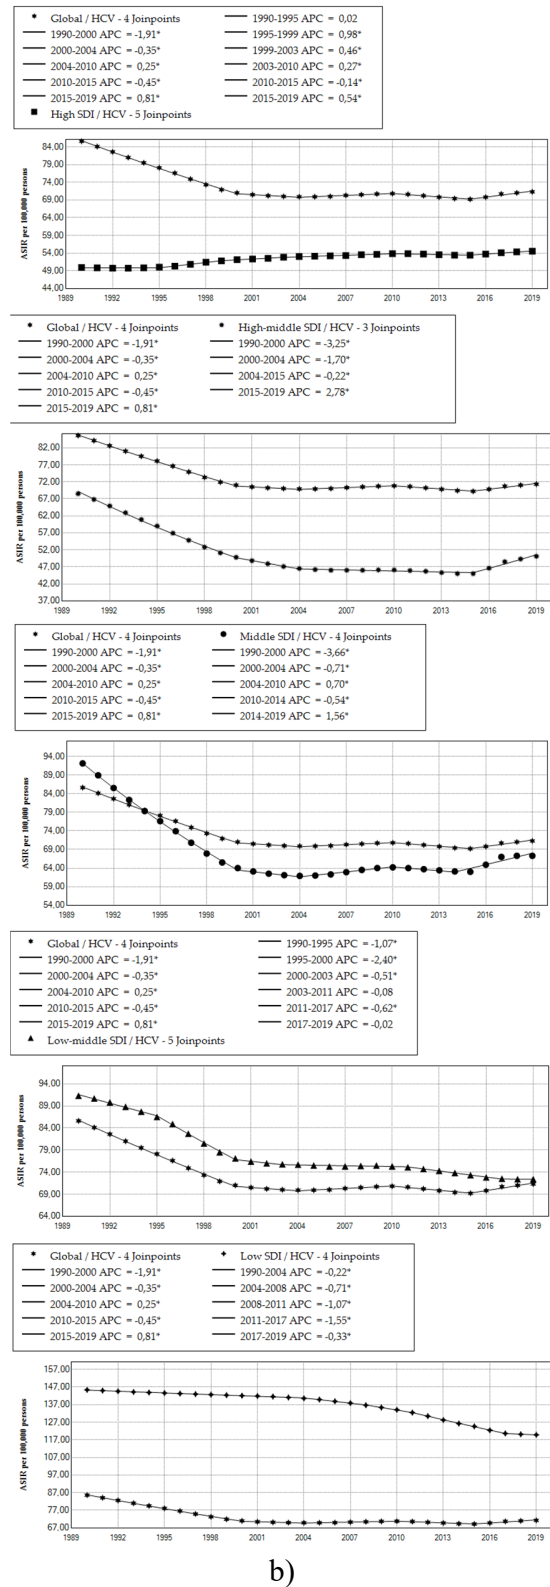

b)

Figure S2. ASIR trends Global and countries grouped by SDI in viral hepatitis all ages and both sexes 1990 – 2019: (a) Trends in HBV incidence; (b) Trends in HCV incidence.

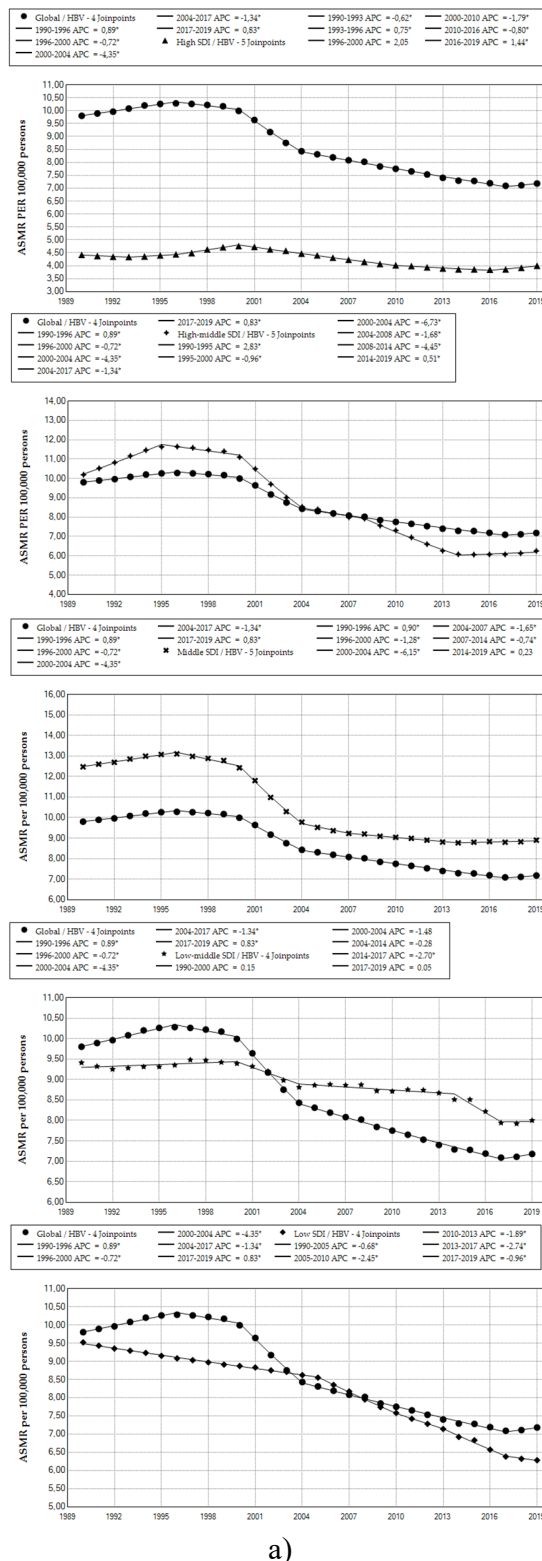

a)

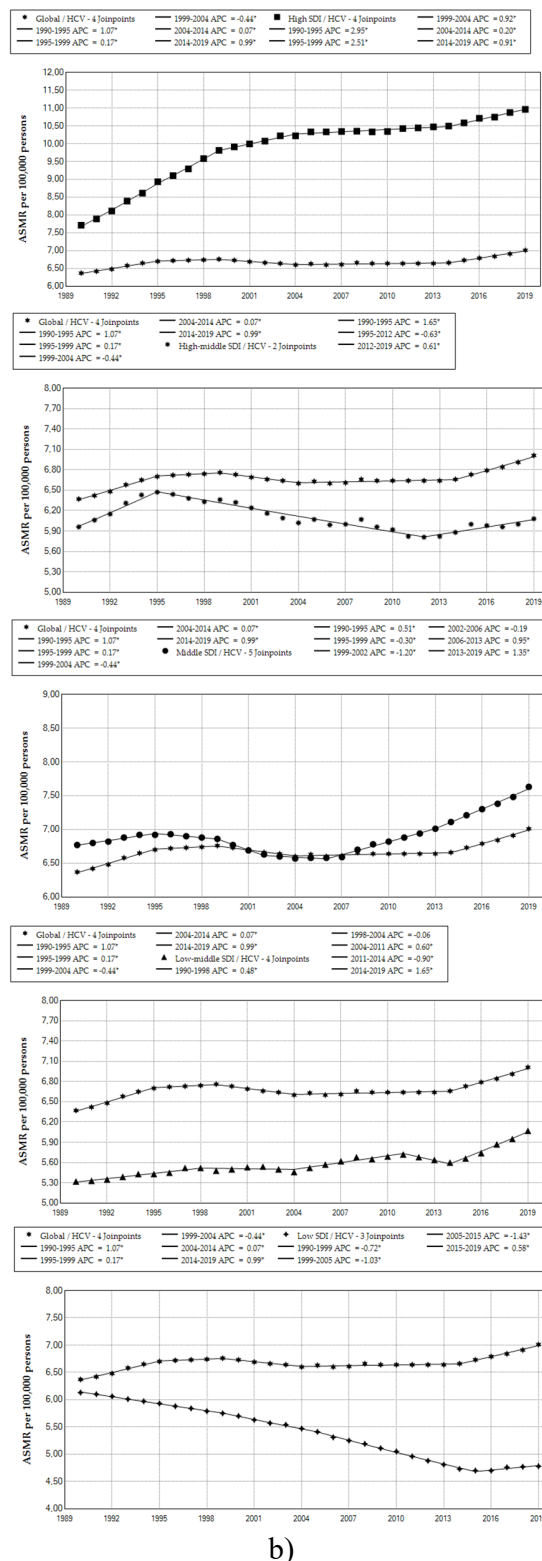

b)

Figure S3. ASMR trends Global and countries grouped by SDI in viral hepatitis all ages and both sexes 1990 – 2019: (a) Trends in HBV mortality; (b) Trends in HCV mortality.
